# Supplementary material
Source: publisher site journal article supplement (https://www.dovepress.com/article/540230)
Supplement: Supplementary file 1 [file 540230%20Supplemental%20Materials_1.docx]

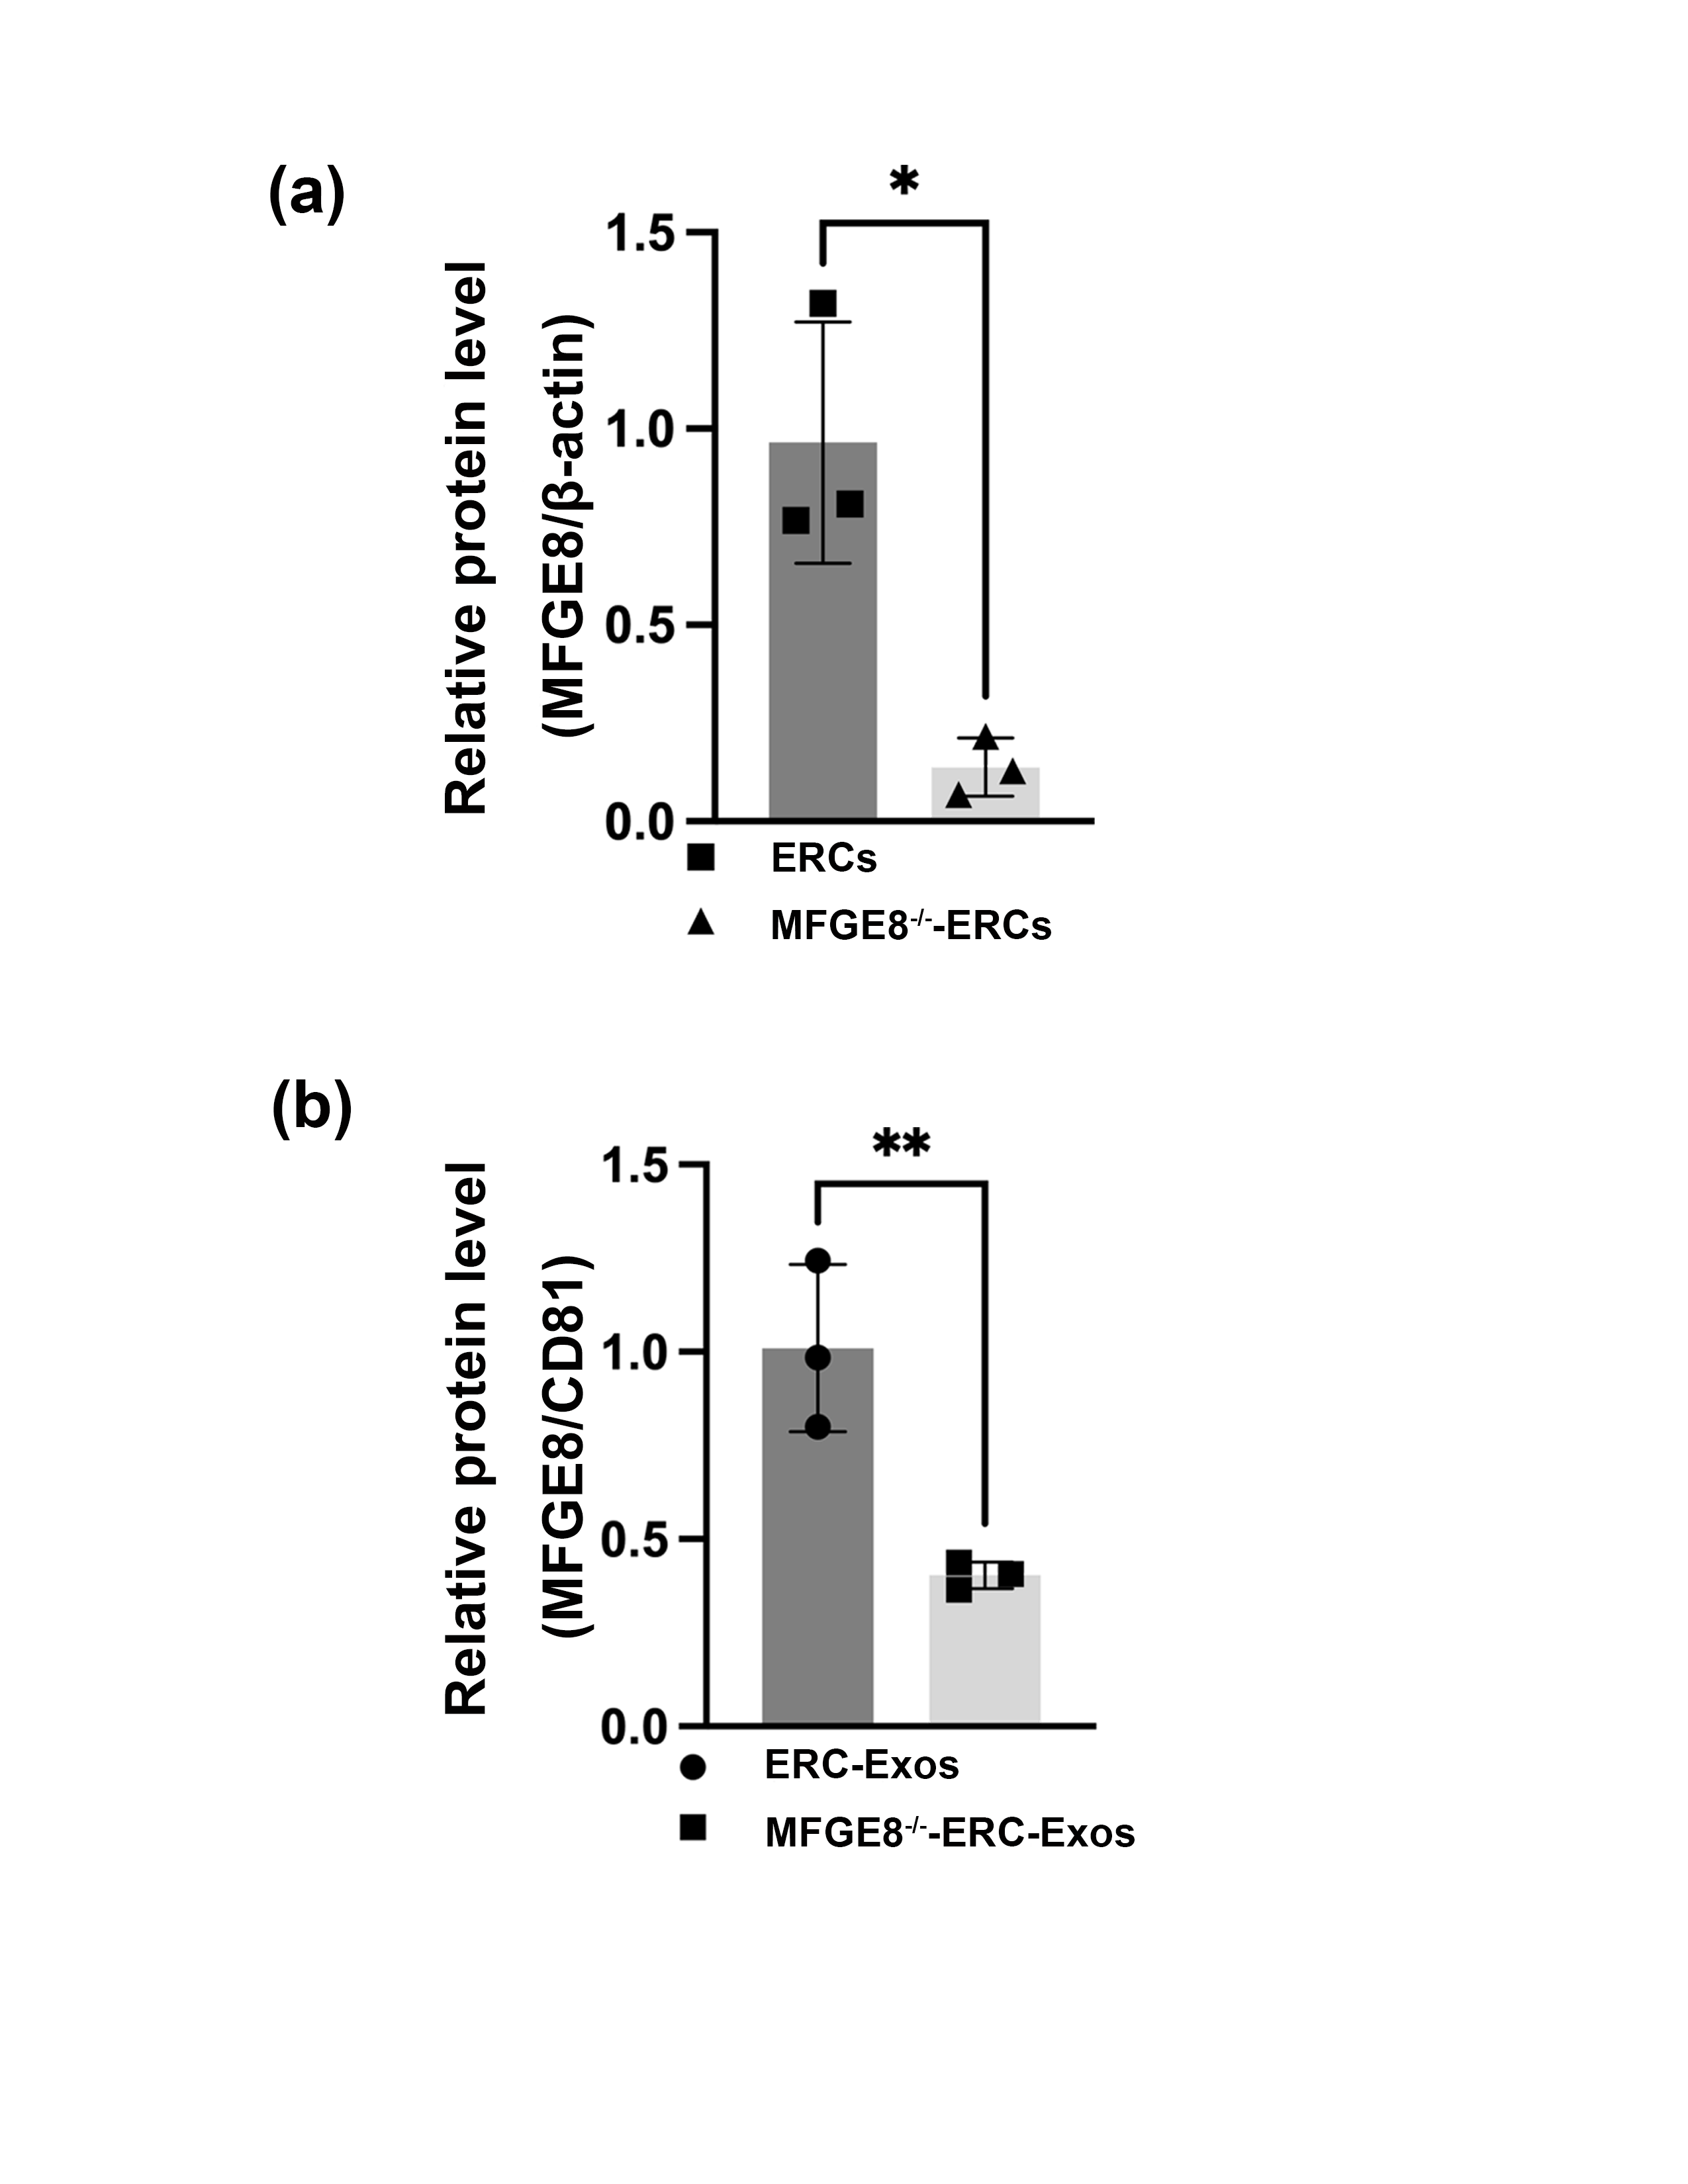


**Figure S1.** **Validation of MFGE8 Knockdown Efficiency in ERCs and ERC-Exos.** (a) Relative protein level of MFGE8 (normalized to β-actin) in ERCs and MFGE8-/--ERCs was determined by Western blot. (b) Relative protein level of MFGE8 (normalized to CD81, an exosomal marker) in ERC-Exos and MFGE8-/--ERC-Exos was analyzed by Western blot. Data were analyzed using one-way ANOVA; *P < 0.05, **P < 0.01.


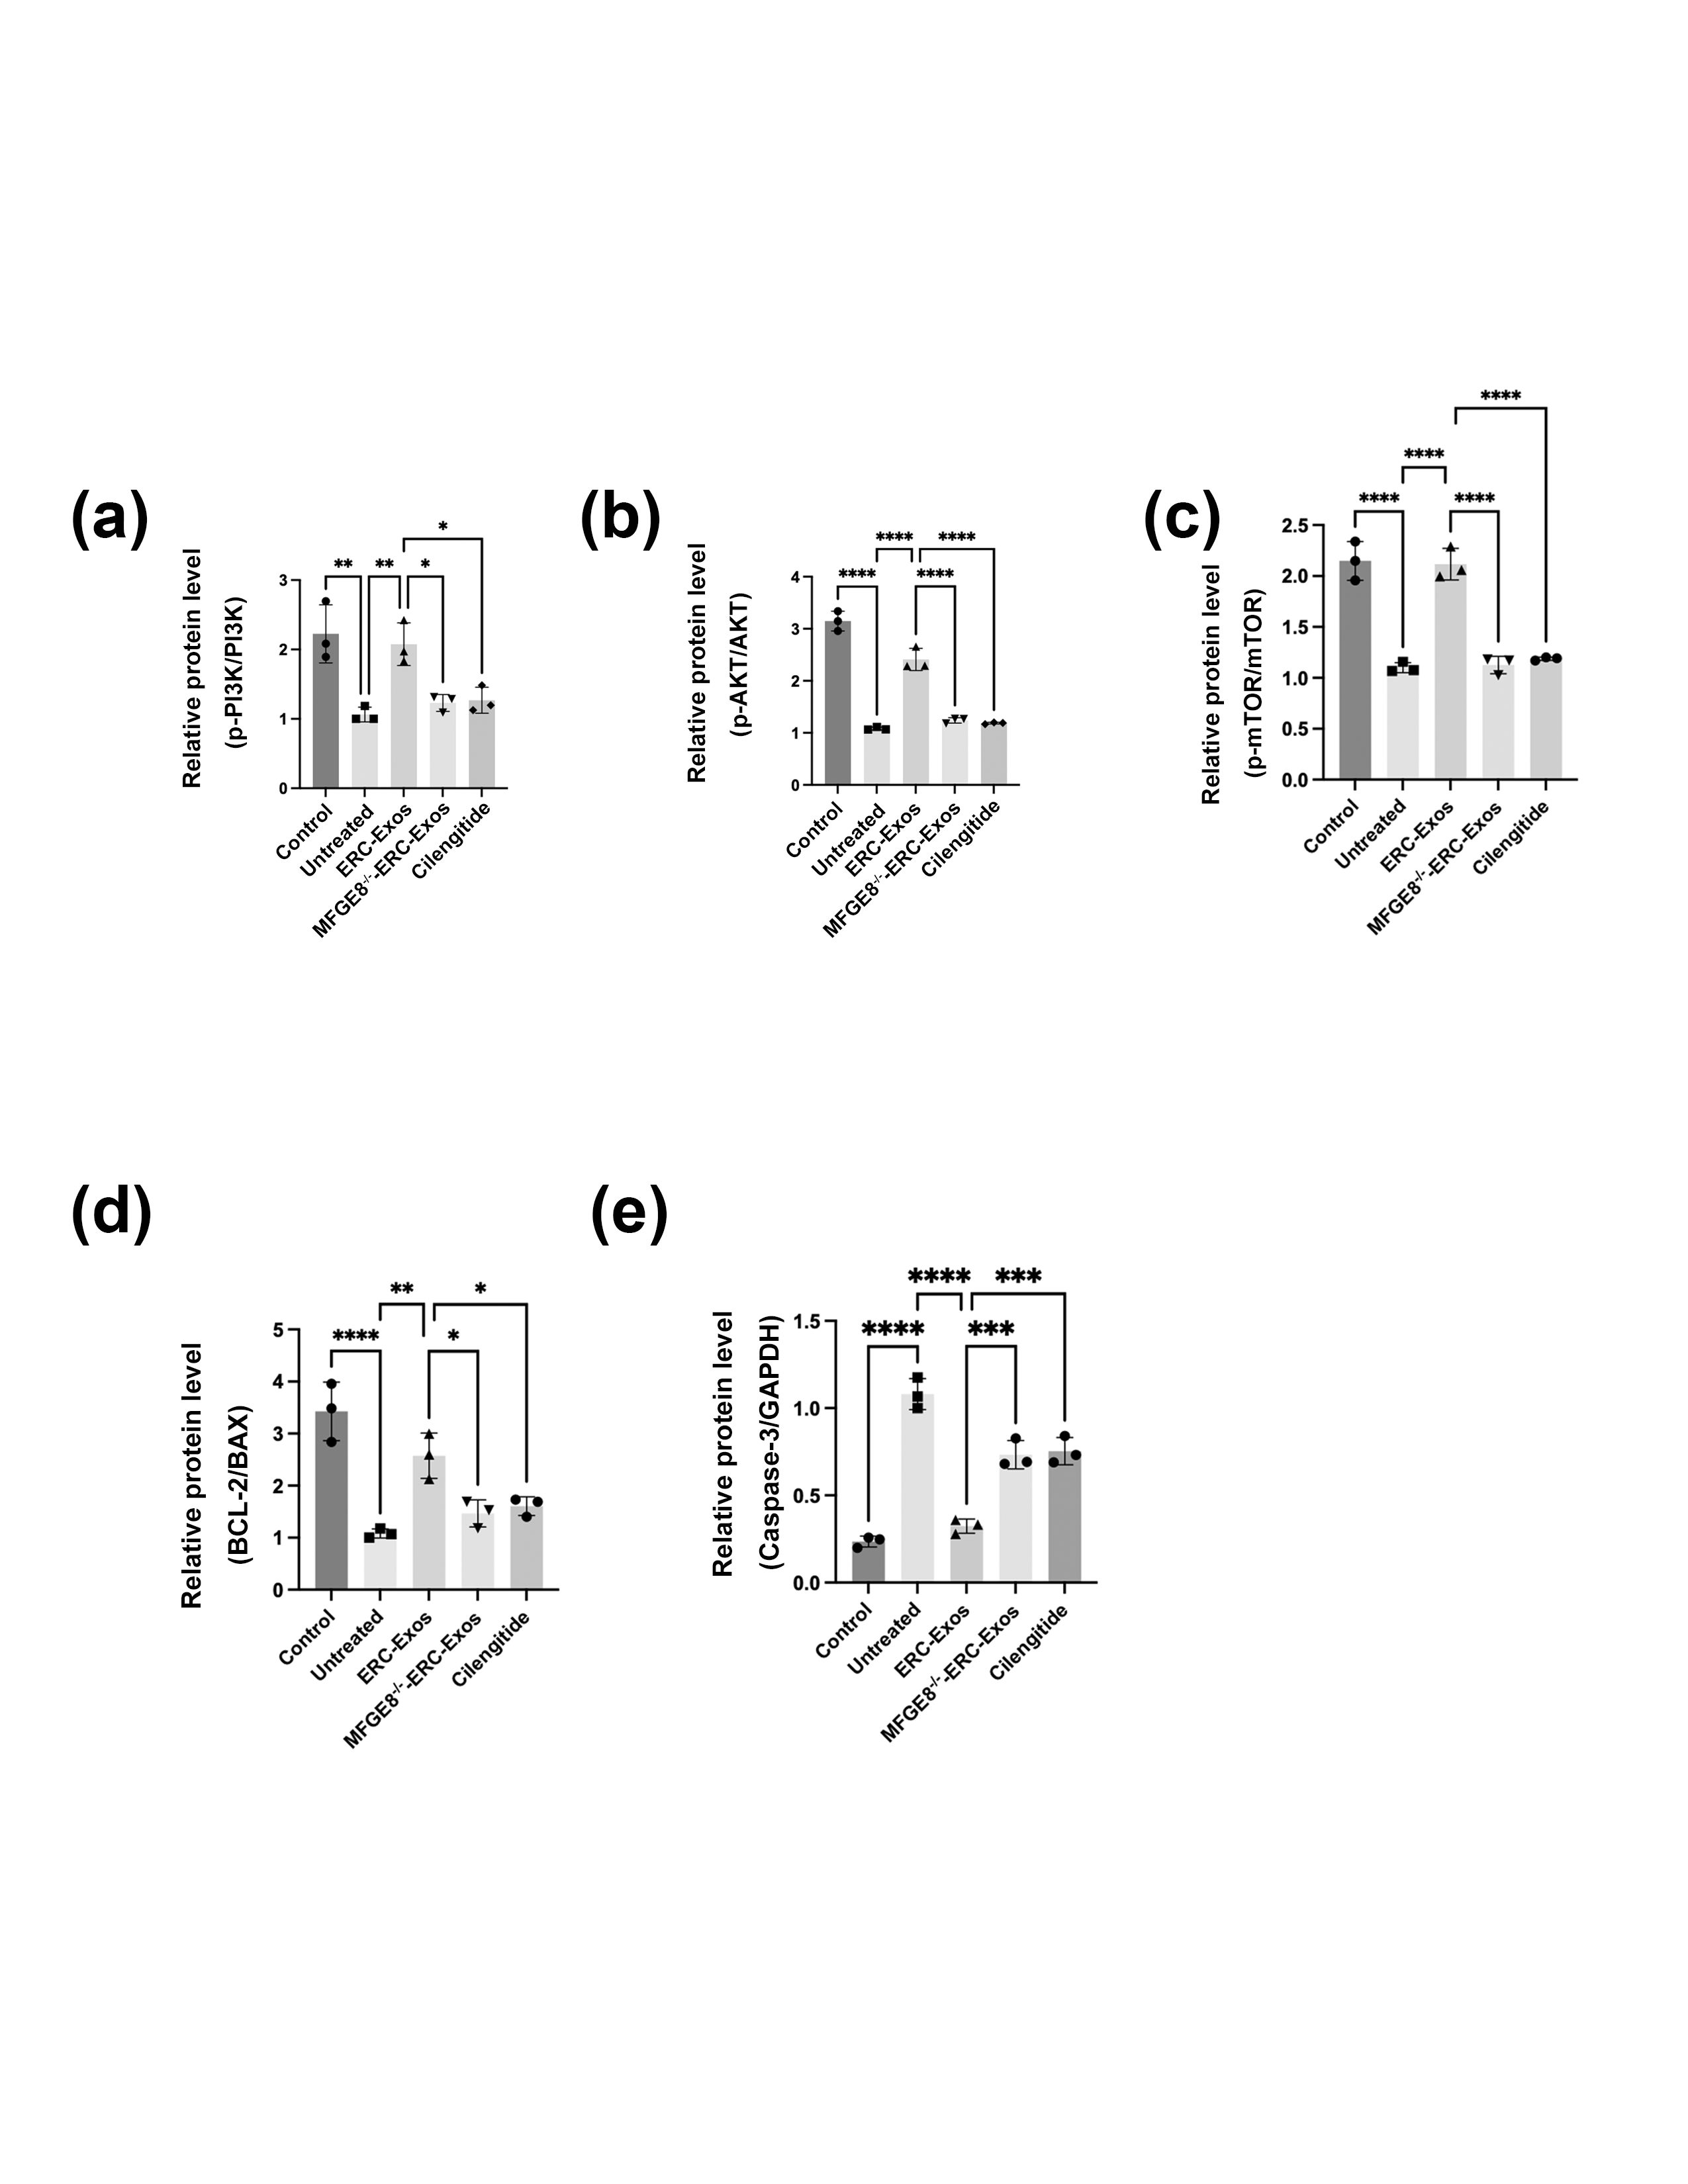
**Figure S2. Analysis of PI3K/AKT/mTOR Signaling Pathway and Apoptosis-Related Protein Levels in Different Treatment Groups.** (a) Relative protein level of p-PI3K/PI3K, (b) p-AKT/AKT, (c) p-mTOR/mTOR, (d) BCL-2/BAX, and (e) Caspase-3/GAPDH in groups including Control, Untreated, ERC-Exos, MFGE8-/--ERC-Exos, and Cilengitide. Data were analyzed using one-way ANOVA; **P* < 0.05, ***P* < 0.01, ****P* < 0.001, *****P* < 0.0001.
